# Supplementary material for: Ectopic ATP Synthase Blockade Suppresses Lung Adenocarcinoma Growth by Activating the Unfolded Protein Response
Source: Oxford University Press journal article supplement (doi:10.1158/0008-5472.can-12-0567), 2012-07-21
Supplement: 00085472can120567-sup-tab1.xlsx [file 00085472can120567-sup-tab1.xlsx]

## Sheet: 工作表1
Table S1. The differential expressed proteins identified by MALDI-TOF mass spectrometry.
Spot	Protein name	UniProt Accession	Gene name	T/C					Score	Coverge	Match peptide	Mr	pI
				12 h	24 h	36 h	48 h	72 h
Protein folding
8	RuvB-like 2	Q9Y230	RUVBL2	0.64	1.14	1.02	1.82	1.64	199	0.53	22	51125	5.49
14	Protein disulfide-isomerase A6	Q15084	PDIA6	0.91	1.45	2.35	2.78	0.59	111	0.34	14	48091	4.95
20	Tubulin-specific chaperone A	O75347	TBCA	0.85	1.16	2.13	0.79	0.31	63	0.52	8	12847	5.25
22	Heat shock 70 kDa protein 4	P34932	HSPA4	0.37	1.64	1.09	0.77	0.26	248	0.38	30	94271	5.11
24	FK506-binding protein 4	Q02790	FKBP4	0.54	0.96	0.29	0.33	0.42	284	0.62	28	51772	5.35
26	Activator of 90 kDa heat shock protein ATPase homolog 1	O95433	AHSA1	1.16	1.7	0.35	0.45	0.84	88	0.38	11	38250	5.41
36	T-complex protein 1 subunit beta	P78371	CCT2	0.94	1.16	0.75	1.45	0.6	149	0.47	19	57452	6.01
39	Endoplasmic reticulum protein ERp29	P30040	ERP29	1.06	1.45	1.03	1.83	0.79	99	0.46	11	28975	6.77
41	Stress-70 protein, mitochondrial	P38646	HSPA9	0.41	1.79	0.21	0.53	3.89	118	0.35	17	73635	5.87
49	T-complex protein 1 subunit gamma	P49368	CCT3	0.69	1.32	0.3	1.21	0.75	80	0.38	13	60495	6.1
mRNA processing
2	heterogeneous nuclear ribonucleoprotein C isoform b	P07910	HNRNPC	1.49	0.18	0.18	1.07	1.36	50	0.28	8	33650	4.95
3	Serine-threonine kinase receptor-associated protein	Q9Y3F4	STRAP	0.92	1.87	0.99	0.74	0.99	243	0.78	23	38414	4.98
6	Heterogeneous nuclear ribonucleoprotein F	P52597	HNRPF	0.73	1.2	1.79	0.79	2.47	103	0.46	13	45643	5.38
30	40S ribosomal protein SA	P08865	RPSA	0.86	1.25	0.55	1.79	0.23	81	0.33	10	32833	4.79
33	Heterogeneous nuclear ribonucleoprotein K	P61978	HNRPK	0.55	1.25	2.43	1	1.87	152	0.45	18	50944	5.39
34	Cytochrome b-c1 complex subunit 1, mitochondrial	P31930	UQCRC1	0.61	1.05	1.3	1.34	1.49	94	0.37	13	52612	5.94
42	Heterogeneous nuclear ribonucleoprotein K	P61978	HNRPK	0.55	1.02	1.26	0.74	2.12	178	0.42	20	50944	5.39
Regulation of cellular protein metabolic process
5	Seryl-tRNA synthetase, cytoplasmic	P49591	SARS	0.43	3.34	1.49	1.24	1.51	113	0.37	16	58740	6.05
7	Eukaryotic translation initiation factor 6	P56537	EIF6	1.42	1.81	2.81	0.69	0.04	88	0.44	10	26582	4.56
12	78 kDa glucose-regulated protein	P11021	HSPA5	2.51	4.26	9.12	3.43	0.21	207	0.43	24	72288	5.07
13	78 kDa glucose-regulated protein	P11021	HSPA5	1.05	0.96	1.09	2.67	1.84	280	0.47	29	72288	5.07
15	26S protease regulatory subunit 6B	P43686	PSMC4	0.81	1.18	0.31	1	0.9	195	0.62	20	47337	5.09
16	Eukaryotic translation initiation factor 2 subunit 1	P05198	EIF2S1	1.02	1.52	1.2	1.22	1.35	214	0.6	23	36089	5.02
17	Glutathione S-transferase Mu 3	P21266	GSTM3	1.13	1.17	1	0.55	0.85	91	0.6	12	26542	5.37
18	Proteasome subunit beta type-4	P28070	PSMB4	0.93	1.64	0.99	1.73	0.12	97	0.53	11	29185	5.72
19	Heat shock protein beta-1	P04792	HSPB1	1.14	0.7	1.67	0.82	1.11	84	0.51	9	22768	5.98
23	Transitional endoplasmic reticulum ATPase	P55072	VCP	0.54	1.62	2.08	0.91	0.34	245	0.39	31	89266	5.14
27	Ubiquitin carboxyl-terminal hydrolase isozyme L1	P09936	UCHL1	0.96	1.64	0.84	0.93	0.26	65	0.5	9	24808	5.33
29	Glutathione S-transferase P	P09211	GSTP1	0.81	1.36	0.98	2.59	0.36	122	0.67	13	23341	5.43
37	26S proteasome non-ATPase regulatory subunit 11	O00231	PSMD11	0.81	0.9	0.6	1.17	2.32	167	0.5	19	47434	6.08
44	Proliferation-associated protein 2G4	Q9UQ80	PA2G4	0.52	1.95	0.61	1.18	1.26	83	0.44	12	43759	6.13
46	Proteasome subunit alpha type-3	P25788	PSMA3	1.58	0.01	0.01	0.98	0.05	69	0.3	9	28415	5.19
50	Glutathione synthetase	P48637	GSS	0.81	1.05	1.39	1.34	0.06	67	0.31	10	52352	5.67
51	Sorting nexin-6	Q9UNH7	SNX6	0.77	0.78	0.76	0.64	0.48	69	0.33	11	46620	5.81
Intermediate filament
4	Keratin, type I cytoskeletal 16	P08779	KRT16	1.15	1.08	0.89	1.1	0.22	62	0.28	10	51236	4.99
32	Lamin-B1	P20700	LMNB1	1.15	1.61	2.43	1.13	1.59	191	0.39	24	66368	5.11
35	Keratin, type II cytoskeletal 1	P04264	KRT1	0.93	0.93	1.42	0.78	0.12	88	0.25	14	65999	8.15
40	Lamin-B2	Q03252	LMNB2	0.77	0.65	0.13	1.17	3.14	213	0.45	27	67647	5.29
45	Keratin, type I cytoskeletal 14	P02533	KRT14	44.11	1.92	1.1	0.5	0.5	60	0.18	10	51529	5.09
Other biological process
1	Tropomyosin alpha-4 chain	P67936	TPM4	1.17	1.28	1.96	0.65	0.33	158	0.44	17	28504	4.67
9	Elongation factor 1-gamma	P26641	EEF1G	0.91	0.41	0.35	1.68	0.56	65	0.27	10	50087	6.25
10	Ezrin	P15311	EZR	0.51	1.44	0.18	1.75	0.2	93	0.29	17	69370	5.94
11	DNA replication licensing factor MCM7	P33993	MCM7	0.39	1.79	0.69	0.84	1.96	79	0.25	15	81257	6.08
21	Protein DJ-1	Q99497	PARK7	1.15	0.89	0.89	1.3	0.08	60	0.53	8	19878	6.33
25	Perilipin-3	O60664	PLIN3	0.13	0.15	1.49	0.77	0.13	87	0.38	12	47018	5.3
28	Leukotriene A-4 hydrolase	P09960	LTA4H	0.7	0.71	0.84	0.57	0.11	113	0.31	16	69241	5.8
31	Coatomer subunit epsilon	O14579	COPE	0.83	0.82	0.99	0.89	1.55	105	0.52	13	34460	4.97
38	Annexin A4	P09525	ANXA4	1.31	1.14	2.39	1.34	0.16	129	0.52	16	35860	5.84
43	PRAME family member 8	Q5VWM4	PRAMEF8	0.43	0.57	1.02	0.8	0.76	70	0.29	12	53633	5.99
47	3-mercaptopyruvate sulfurtransferase	P25325	MPST	1.14	0.65	1.24	1.43	0.48	65	0.35	9	33158	6.13
48	L-lactate dehydrogenase B	P07195	LDHB	0.62	0.35	1.03	0.19	0.18	123	0.49	14	36615	5.71
